# Supplementary material
Source: PubMed Central journal article supplement (PMC3710741)

**A**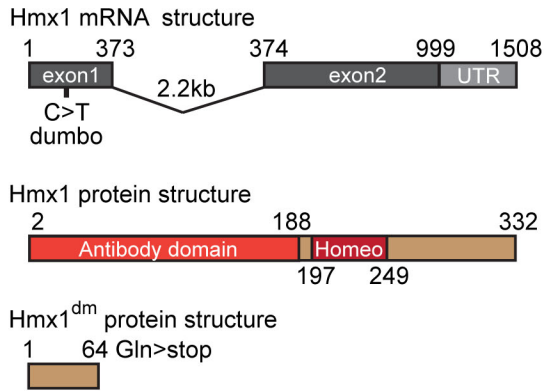**B**

Top: Native sequence  
Middle: conserved bases  
Bottom: GC-optimized sequence

| v10                                                                                                  | v20 | v30 | v40 | v50 | v60 | v70 | v80 | v90 | v100      |
|------------------------------------------------------------------------------------------------------|-----|-----|-----|-----|-----|-----|-----|-----|-----------|
| ATGCCGATGAGCTGACCGAGCCCGGGCGGCCACACCAGCTCGCGCCTCCTCCTCATCGAGAACCTGCTAGCAGCCGAGGCCAAGGGCGCGGGGC       |     |     |     |     |     |     |     |     |           |
| ATGCC GA GA CTGAC GAGCC GG G GC AC CCAGC G GCC CTC TTCCT ATCGAGAA CTGCT GC GCCGAGGCCAA GG GC GG C    |     |     |     |     |     |     |     |     |           |
| ATGCCCGACGAACTGACAGAGCCAGGCAGGGCTACTCCAGCAAGGGCCAGCTCATTCCTGATCGAGAATCTGCTGGCCGCGAGGCCAAAGGTGCCGGCC  |     |     |     |     |     |     |     |     |           |
| ^10 ^20 ^30 ^40 ^50 ^60 ^70 ^80 ^90 ^100                                                             |     |     |     |     |     |     |     |     | C>T dumbo |
| GCTCAACCAGGGCGATGGCGTCCGCGAGGAAGAGGAAGAGGACGACGACGACCCGAGGACGAGGATCCGGAGCAGGCGCGACGACTACAGCGGCG      |     |     |     |     |     |     |     |     |           |
| G ACCCAGGG GA GGCCT G GAGGAAGA GA GAGGACGA GACGACCC GAGGACGAGGA CC GAGCAGGC GA GACG CT CAGCGG G      |     |     |     |     |     |     |     |     |           |
| GAAGTACCCAGGGAGACGGCGTGAGGGAGGAAGAAGAGGAGGACGATGACGACCCAGAGGACGAGGACCCGAGCAGGCTAGAAGACGCCTCCAGCGGAG  |     |     |     |     |     |     |     |     |           |
| ^110 ^120 ^130 ^140 ^150 ^160 ^170 ^180 ^190 ^200                                                    |     |     |     |     |     |     |     |     |           |
| GCGACAGCAGCGCGCGGGCAGCGGGCCGGGGAGGCGAGGGCCCGGGCACTGGGCCCTAGGGCCCCGGCCCTCCTGGGCCCGGGCCCTTCGCG         |     |     |     |     |     |     |     |     |           |
| GCG CAGCAG G GC GGC GG CC GG GGGGA GC AGGGCC G GC CTGGCCCT GG CCC GGCC CC CC GGGCC GG CC CCCTTCGC    |     |     |     |     |     |     |     |     |           |
| GCGCCAGCAGAGAGCCGGCTCAGGTCCTGGGGGGGAAGCAAGGGCCAGAGCTTGGGCCCTGGGACCCAGGCCCCCCCAGGGCCTGGACCCCTTCGCA    |     |     |     |     |     |     |     |     |           |
| ^210 ^220 ^230 ^240 ^250 ^260 ^270 ^280 ^290 ^300                                                    |     |     |     |     |     |     |     |     |           |
| CTCGGCTGCGGAGGTACAACGCGGTGGTACCCACGGGTGCACGGCGGCTACGGAGGTGGTCTAAGTCCTGACACAAGCGACCGGGACTCTCCGGAGACCG |     |     |     |     |     |     |     |     |           |
| CT GGCTG GG GGTAC AC CGTGGTACCC G GT CACGG GGCTACGG GG GG CT CC GACAC CGACCGGA TC CC GA AC G         |     |     |     |     |     |     |     |     |           |
| CTGGGCTGTGGTGGTACCACCCGGTGGTACCCAGAGTCCACGGAGGCTACGGGGGGGGCCTCTCCCGGACACTTCCGACCGGGATTCCCAGAAACAG    |     |     |     |     |     |     |     |     |           |
| ^310 ^320 ^330 ^340 ^350 ^360 ^370 ^380 ^390 ^400                                                    |     |     |     |     |     |     |     |     |           |
| GCGAGGAGATGGGCCGCGCAGAGAGCGCCTGGCCCGGGTGCCCGGGCCGGGAACCGTTCGCGGGAGGTGACGACGCGAGGGCCCGGGCAGCCGGCGGGGA |     |     |     |     |     |     |     |     |           |
| GCGAGGA ATGGCCCG CAGAG CGC TGGCC CG TGCC GG CC GG AC GT CC G GAGGTGAC AC CAGGG CC GC ACCGGCGG GA     |     |     |     |     |     |     |     |     |           |
| GCGAGGAAATGGCCCGGGCAGAGTCCGCTTGGCTCGCTGCCAGGCCACTGTGCAAGAGAGGTGACAACCCAGGGCCAGCAACCGGGCGGCA          |     |     |     |     |     |     |     |     |           |
| ^410 ^420 ^430 ^440 ^450 ^460 ^470 ^480 ^490 ^500                                                    |     |     |     |     |     |     |     |     |           |
| GGAGGCGCGGAGTTGGCCGAGGCTCCAGCGTGGCGGGCGCGCAGCGAGGGAGGCGCGGTGGCCGAGGAAGAAGACGCGCAGGCTTCTCGCGC         |     |     |     |     |     |     |     |     |           |
| GAGGC GC GAG TGGC GA GC CCAGC GTGGC GC GC ACAGG GAGGC CGCGGTGGCCG G AAGAAGC CG AC GT TT TC CGC       |     |     |     |     |     |     |     |     |           |
| AGAGGCCCGCAGAGCTGGCTGAAGCCCCAGCCGTGGCCCGCAGCCGCTACAGCCGAGGCCCGCGGTGGCCCGGAAAGAAGACCCGGACCGTGTTCCTCGC |     |     |     |     |     |     |     |     |           |
| ^510 ^520 ^530 ^540 ^550 ^560 ^570 ^580 ^590 ^600                                                    |     |     |     |     |     |     |     |     |           |
| AGCCAGGTCTTCCAGCTCGAGTCCACTTTCGATCTGAAGCGCTACCTGAGCAGCGCAGAGCGCGGGCCCTCGCCGCTCGCTGCAGCTCACGGAGACGC   |     |     |     |     |     |     |     |     |           |
| CAGGT TTCAGT GAG ACTTTCGATCTGAA CGCTACCTGAGCAGCG GAG G GC GG CT GC GC CT CAGCTCAC GA AC C            |     |     |     |     |     |     |     |     |           |
| TCTCAGGTGTTCCAGCTGGAGAGTACTTTCGATCTGAAACGCTACCTGAGCAGCGCCGAGAGAGCTGGACTGGCTGCTAGTCTCCAGTCCAGAAACCC   |     |     |     |     |     |     |     |     |           |
| ^610 ^620 ^630 ^640 ^650 ^660 ^670 ^680 ^690 ^700                                                    |     |     |     |     |     |     |     |     |           |
| AGGTCAGTCTGGTTTTCAGAACCCCGCAACAGTGGAAAGCGGAGCTGGCAGCGGAGCTGGAGGCGGCCAGCCCTGTCCCGCCGGGTGCGCAGCGCCT    |     |     |     |     |     |     |     |     |           |
| AGGTCAA AT TGGTT CAGAACCG G AA AAGTGGAG G CAGCTGGCAGC GA CTGGA GC GC CCTGTCCCC CC GGTGC CAG G CT     |     |     |     |     |     |     |     |     |           |
| AGGTCAAAATTTGGTTCAGAACCCGAGGAATAAGTGGAAAGAGACAGCTGGCAGCAGAACTGGAAGCTGCTTCCCTGTCCCACCCAGGTGCACAGAGGT  |     |     |     |     |     |     |     |     |           |
| ^710 ^720 ^730 ^740 ^750 ^760 ^770 ^780 ^790 ^800                                                    |     |     |     |     |     |     |     |     |           |
| GGTCCGCGTGGCGGTGCTTACCACGAGAGTCCCCGGCCGCGGGGCGCGCTGCTTCCCGCTGGCGCCCGCCGACCCGACCCGCGCCGCGCCG          |     |     |     |     |     |     |     |     |           |
| GGT CG GTGC GTGCT TACCA GAG CC CC GCGCCG GG CC GC CTGCC TT CC CT GC CC CC GC CC CC CC CC             |     |     |     |     |     |     |     |     |           |
| GGTGGCGGTGCCCGTGTGTACCATGATCCCCCTCCCGCCGCGCAGGACCAGCCCTGCCATTTCCACTGCCCCACCTGCCCTGCCACCTCCCCCT       |     |     |     |     |     |     |     |     |           |
| ^810 ^820 ^830 ^840 ^850 ^860 ^870 ^880 ^890 ^900                                                    |     |     |     |     |     |     |     |     |           |
| CTGCTTGGTTTCTCGGGCGCGCTTGCTTACCCGCTTGGCGCCTTCCCTGCCGCGCCTCGGTGCCCTTCCCTTCGCGCGCAGAT                  |     |     |     |     |     |     |     |     |           |
| CT CT GG TT GG GC CT GC TA CC CT GC GCCTTCCCTGCCGCGC TC GT CC TTCCT CG GC CAGAT                      |     |     |     |     |     |     |     |     |           |
| CTCCTGGGTTTGTGGTCTGCGCATATCCACTGGCTGCCCTTCCCTGCCGCGCATCCGTCCCTTCCCTGCGGGTCCAGAT                      |     |     |     |     |     |     |     |     |           |
| ^910 ^920 ^930 ^940 ^950 ^960 ^970 ^980                                                              |     |     |     |     |     |     |     |     |           |

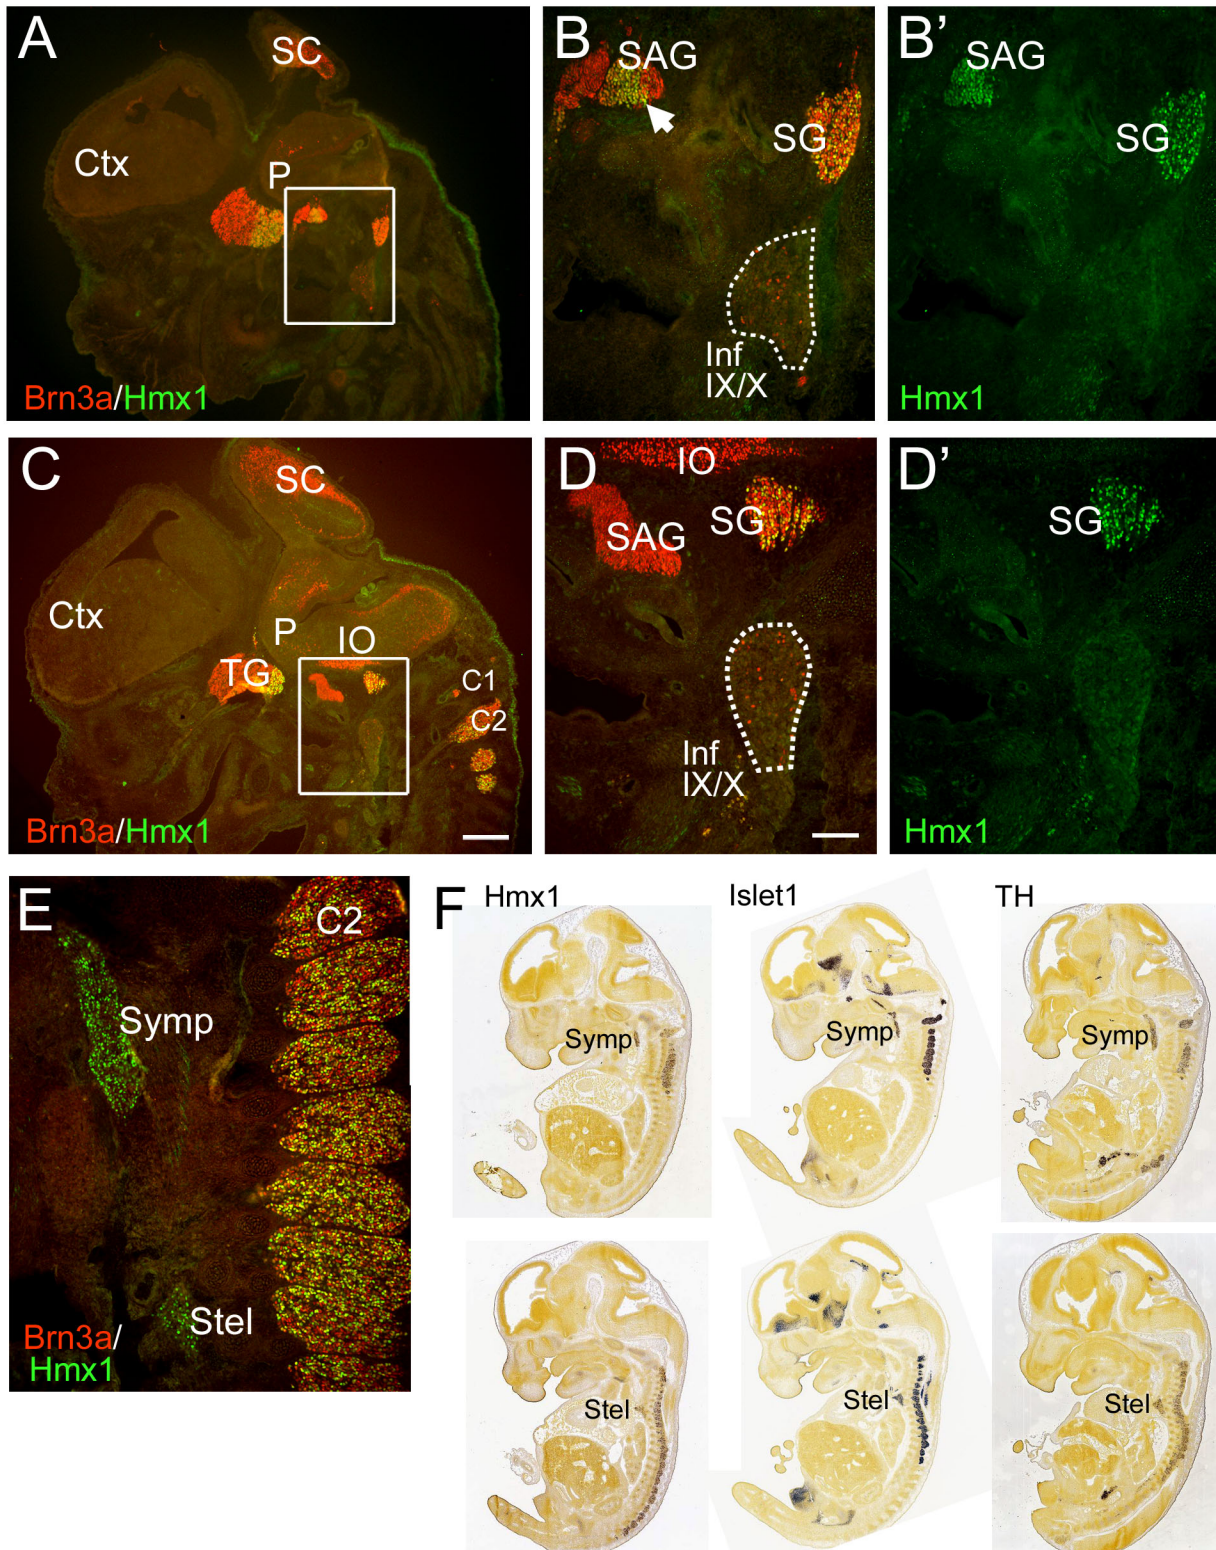

Quina et al., Figure S2



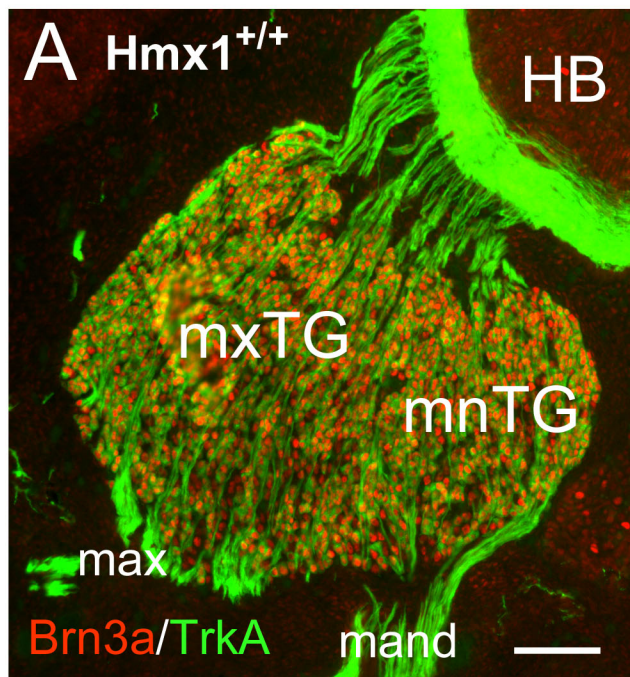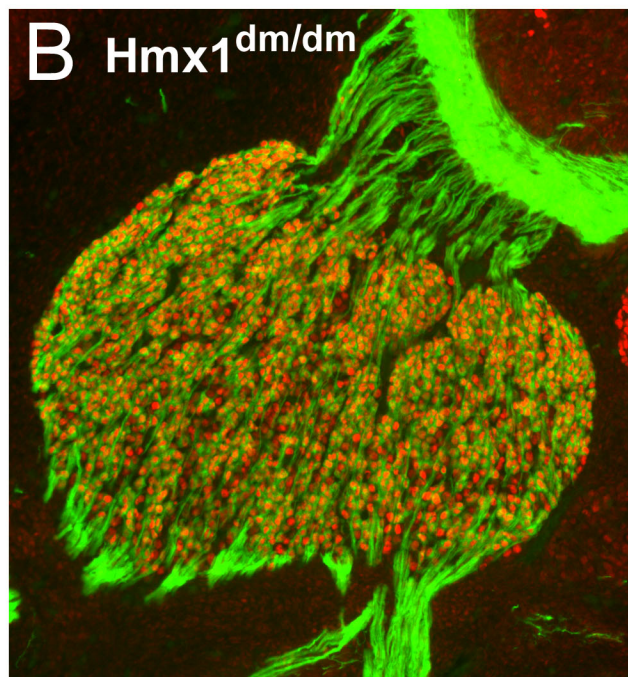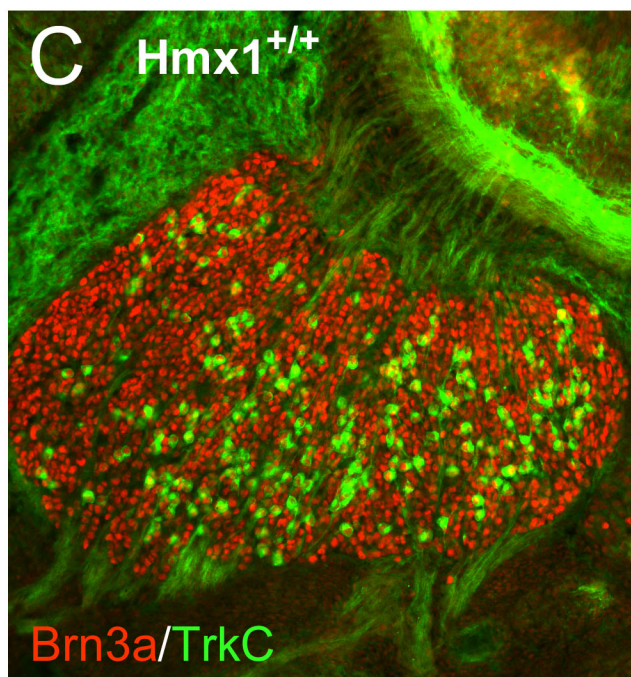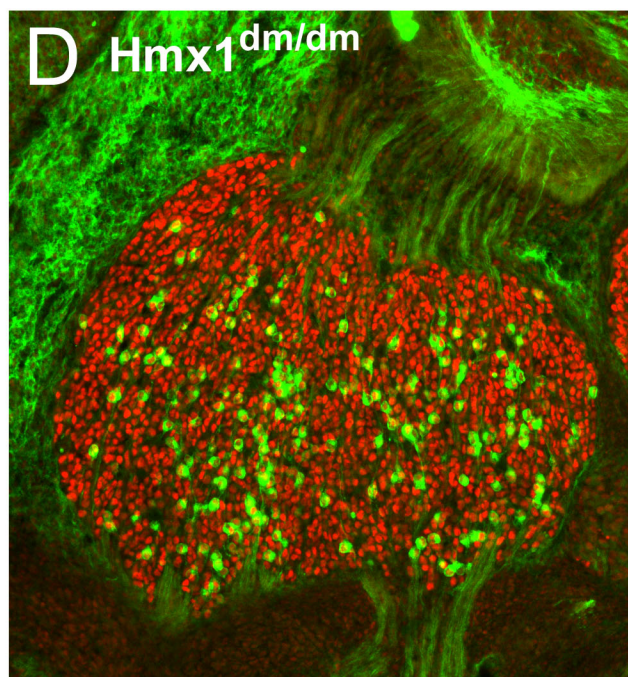



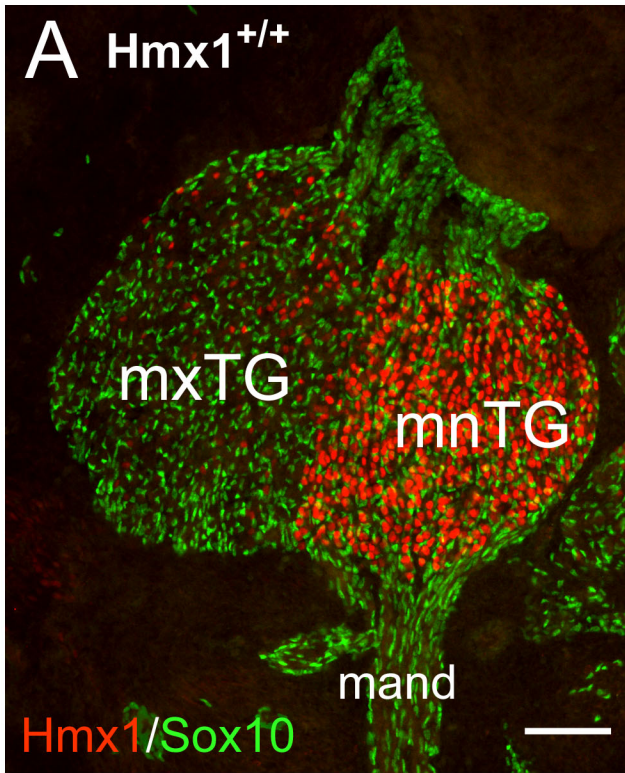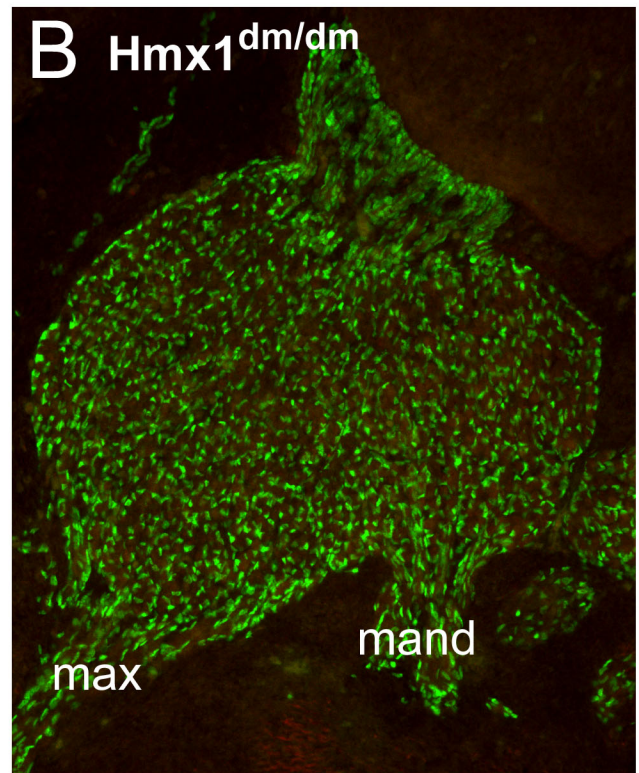

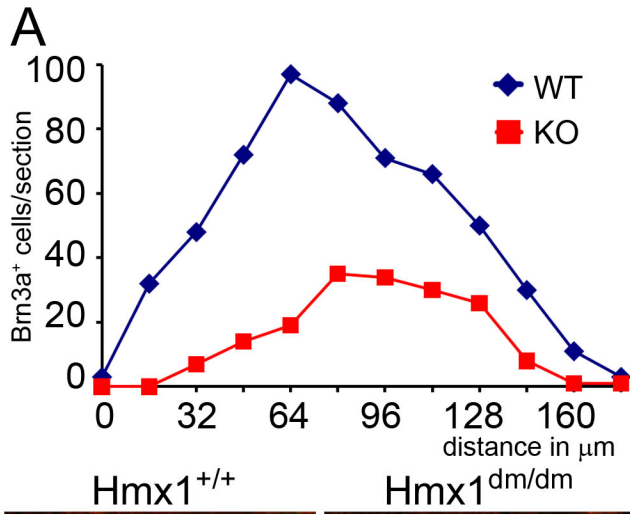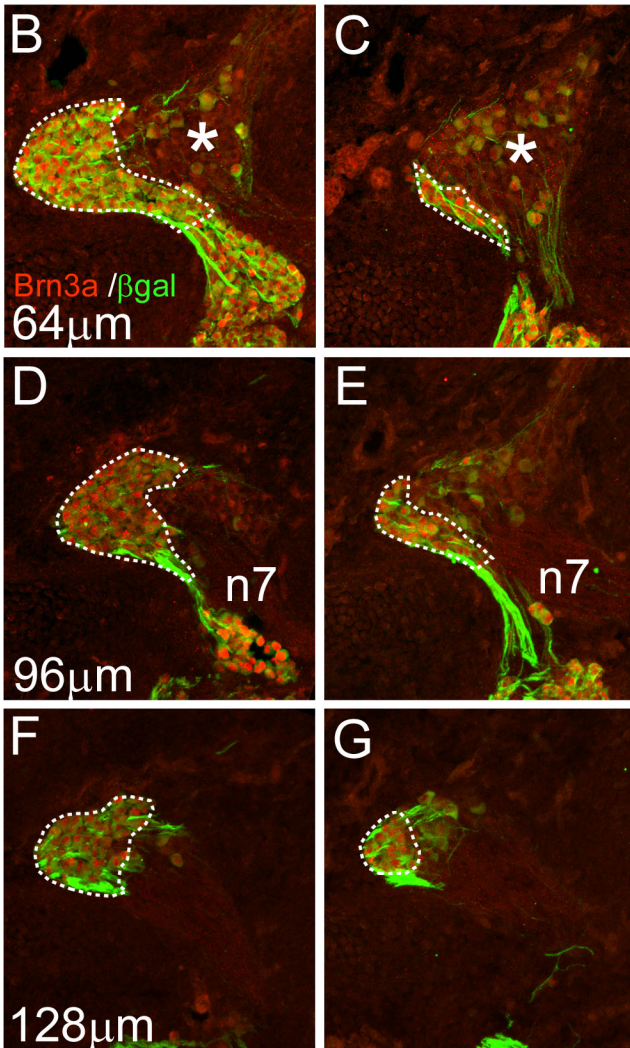

Supplement: NIHMS361668-supplement-01.pdf [file NIHMS361668-supplement-01.pdf]
